# Supplementary material for: Still waters run deep in large-scale genome rearrangements of morphologically conservative Polyplacophora
Source: eLife. 2025 Apr 17;13:RP102542. doi: 10.7554/eLife.102542 (PMC12005716; doi:10.7554/eLife.102542)
Supplement: Supplementary file 1. — Table S1. Summary statistics from genome sequencing of four new chiton genomes, including HiFi and Hi-C. Table S2. Genome assemblies and gene-model prediction for four new chiton genomes. Table S3. Comparison of summary data among available chitons genomes; the four new chiton genomes are indicated in bold text. N.B. analyses also incorporate the other chromosome-level genome for Liolophura japonica, which was published prior to the present study. Table S4. Nonsyntenic rate between species (summarised by clade in Table S5) following the method described in the Supporting Information appendix. Table S5. Summary information for translocation rate of 25 species of molluscs, organised by taxonomic class. [file elife-102542-supp1.xlsx]

## Sheet: Content
Supplementary File 1
Sigwart et al. Still waters run deep: Large scale genome rearrangement in the evolution of morphologically conservative Polyplacophora
Table S1	The statistics of sequencing in four genomes, including HiFi, RNA, HiC
Table S2	Genome assemblies and annotations
Table S3	Comparison in chitons genomes
Table S4	Nonsyntenic rate between species
Table S5	Translocation rate at 25 species

## Sheet: Table S1
Table S1. Summary statistics from genome sequencing of four new chiton genomes, including HiFi and Hi-C
		Deshayesiella sirenkoi	Callochiton septemvalvis	Acanthochitona discrepans	Acanthochitona rubrolineata
	Sampling area	Daikoku vent field, W Pacific Ocean	intertidal of Strangford Lough, N Ireland		intertidal of Quingdao, China
HiFi	Number of reads	4713356	8086367	5785025	3675326
	Sum of reads	78716116715	39763935831	30682344156	57655991192
Hi-C (PE150)	Number of reads	813659868	2040374584	302327576	778302886
	Sum of reads	122048980200	306056187600	45349136400	77830288600
RNA-seq (PE150)	Number of reads	266566140	674717978	79653804	1538788440
	Sum of reads	39984921000	101207696700	11948070600	230477194919

## Sheet: Table S2
Table S2. Genome assemblies and gene-model prediction for four new chiton genomes.				Table S2. (continued) Genome assemblies and gene-model prediction for four new chiton genomes.
		Acanthochitona discrepans	Acanthochitona rubrolineata			Callochiton septemvalvis	Deshayesiella sirenkoi
contig-level	Number	704	165	contig-level	Number	3543	358
	Total base	1173574984	1093798424		Total base	1229767851	1546234380
	contig > 1M (number / total size)		52 / 1,075,127,699		contig > 1M (number / total size)	200 / 258,518,145	103 / 1,522,658,405
	L50 / N50	88 / 4,185,741	12 / 31,466,278		L50 / N50	663 / 619,644	19 / 27,005,026
	Completeness	C:97.4%[S:95.0%,D:2.4%],F:1.3%,M:1.3%	C:97.4%[S:95.0%,D:2.4%],F:1.8%,M:0.8%,n:954		Completeness	C:94.0%[S:90.9%,D:3.1%],F:3.0%,M:3.0%,n:954	C:97.0%[S:96.2%,D:0.8%],F:2.0%,M:1.0%,n:954
pseuchromosome-level	Number	396	112	pseuchromosome-level	Number	416	207
	Total base	1173685984	1093855924		Total base	1231359351	1546349880
	Chromosomes	8	8		Chromosomes	13	11
	Anchored rate	0.9434	0.9839		Anchored rate	0.9633	0.993
	Completeness	C:95.5%[S:93.9%,D:1.6%],F:1.0%,M:3.5%,n:954	C:97.2%[S:95.3%,D:1.9%],F:2.0%,M:0.8%,n:954		Completeness	C:94.2%[S:91.7%,D:2.5%],F:2.8%,M:3.0%,n:954	C:97.0%[S:96.4%,D:0.6%],F:2.0%,M:1.0%,n:954
Gene-model	Number of genes (longest isoform)	21027	20043	Gene-model	Number of genes (longest isoform)	19591	23050
	Completeness	C:95.5%[S:93.9%,D:1.6%],F:1.0%,M:3.5%,n:954	C:95.6%[S:93.9%,D:1.7%],F:1.7%,M:2.7%,n:954		Completeness	C:93.2%[S:90.0%,D:3.2%],F:2.2%,M:4.6%,n:954	C:95.0%[S:94.1%,D:0.9%],F:1.2%,M:3.8%,n:954
	Number of proteins (all isoforms)	21027	30176		Number of proteins (all isoforms)	23429	28132
	Completeness	C:95.5%[S:93.9%,D:1.6%],F:1.0%,M:3.5%,n:954	C:95.6%[S:75.9%,D:19.7%],F:1.7%,M:2.7%,n:954		Completeness	C:93.3%[S:81.8%,D:11.5%],F:2.2%,M:4.5%,n:954	C:95.1%[S:80.7%,D:14.4%],F:1.2%,M:3.7%,n:954
	Nr	18950	27177		Nr	21256	25312
	GO	16531	22481		GO	17456	16145
	KEGG	8723	15195		KEGG	11313	11232

## Sheet: Table S3
Table S3. Comparison of summary data among available chitons genomes; the four new chiton genomes are indicated in bold text. N.B. analyses also incorporate the other chromosome-level genome for Liolophura japonica, which was published prior to the present study.							Table S3. (continued) Comparison of summary data among available chitons genomes; the four new chiton genomes are indicated in bold text. N.B. analyses also incorporate the other chromosome-level genome for Liolophura japonica, which was published prior to the present study.
Order: Family	Species	Reference	Assembly level	Chromosomes	Genome size (bp)	N50 (bp) / L50	Completeness (genome, busco 5.2.2, metazoa_odb10)	Contigs or Scaffolds	Completeness (the longest coding isoforms)	Number of proteins (the longest isoforms)
Lepidopleurida: Protochitonidae	Deshayesiella sirenkoi	this study	chromosome	11	1546349880	169,292,669 / 4	C:97.0%[S:96.2%,D:0.8%],F:2.0%,M:1.0%	207	C:95.0%[S:94.1%,D:0.9%],F:1.2%,M:3.8%	23050
Lepidopleurida: Hanleyidae	Hanleya hanleyi	Varney et al., 2022	contig	unknown	2516608230	65,037 / 10427	C:79.4%[S:74.4%,D:5.0%],F:12.6%,M:8.0%	57495	C:81.8%[S:75.6%,D:6.2%],F:11.1%,M:7.1%	69284
Callochitonida: Callochitonidae	Callochiton septemvalvis	this study	chromosome	13	1231359351	80,830,436 / 4	C:94.0%[S:90.9%,D:3.1%],F:3.0%,M:3.0%	416	C:93.2%[S:90.0%,D:3.2%],F:2.2%,M:4.6%	19591
Chitonida: Schizochitonidae	Schizochiton incissus	Liu et al., 2023	contig	unknown	585667302	25,469 / 6,633	C:63.5%[S:58.2%,D:5.3%],F:14.5%,M:22.0%	25461	C:40.9%[S:37.5%,D:3.4%],F:19.8%,M:39.3%	20902
Chitonida: Chitonidae	Liolophura japonica	HKBGC, 2024	chromosome	13	609495693	37,343,639	C:96.2%[S:95.6%,D:0.6%],F:2.0%,M:1.8%	632	C:91.0%[S:90.3%,D:0.7%],F:4.9%,M:4.1%	25163
Chitonida: Chitonidae	Acanthopleura granulata	Varney et al., 2020	contig	unknown	606536932	23,921,462 / 9	C:95.8%[S:95.2%,D:0.6%],F:2.3%,M:1.9%	87	C:94.0%[S:93.4%,D:0.6%],F:2.4%,M:3.6%	20470
Chitonida: Acanthochitonidae	Acanthochitona rubrolineata	this study	chromosome	8	1093855924	154,826,102 / 3	C:97.4%[S:95.0%,D:2.4%],F:1.8%,M:0.8%	112	C:95.6%[S:93.9%,D:1.7%],F:1.7%,M:2.7%	20043
Chitonida: Acanthochitonidae	Acanthochitona discrepans	this study	chromosome	8	1173685984	199,945,981 / 3	C:97.4%[S:95.0%,D:2.4%],F:1.3%,M:1.3%	396	C:95.5%[S:93.9%,D:1.6%],F:1.0%,M:3.5%	21027

## Sheet: Table S4
Table S4. Nonsyntenic rate between species (summarised by clade in Table S5) following the method described in the Supporting Information appendix.									Table S4. (continued) Nonsyntenic rate between species (summarised by clade in Table S5) following the method described in the Supporting Information appendix.									Table S4. (continued) Nonsyntenic rate between species (summarised by clade in Table S5) following the method described in the Supporting Information appendix.
	Conchocele bisecta	Mactra quadrangularis	Mizuhopecten yessoensis	Limnoperna fortunei	Mytilisepta virgata	Mytilus unguiculatus	Pinctada fucata	Magallana gigas		Patella vulgata	Gibbula magus	Chrysomallon squamiferum	Gigantopelta aegis	Aplysia californica	Biomphalaria straminea	Arion vulgaris	Acthatina fulica		Pomacea canaliculata	Monoplex corrugatus	Deshayesiella sirenkoi	Callochiton septemvalvis	Acanthochitona discrepans	Acanthochitona rubrolineata	Liolophura japonica	Pictodentalium vernedei
Conchocele bisecta									Conchocele bisecta									Conchocele bisecta
Mactra quadrangularis	12.2867								Mactra quadrangularis									Mactra quadrangularis
Mizuhopecten yessoensis	12.3709	14.3452							Mizuhopecten yessoensis									Mizuhopecten yessoensis
Limnoperna fortunei	12.0197	14.7011	9.41865						Limnoperna fortunei									Limnoperna fortunei
Mytilisepta virgata	12.8639	15.122	10.2979	6.5991					Mytilisepta virgata									Mytilisepta virgata
Mytilus unguiculatus	14.9859	16.6287	12.2045	9.02618	9.84735				Mytilus unguiculatus									Mytilus unguiculatus
Pinctada fucata	13.8936	16.6478	11.91	12.5749	13.324	15.2273			Pinctada fucata									Pinctada fucata
Magallana gigas	13.1634	15.8693	11.4128	11.8551	11.9104	13.6531	12.9445		Magallana gigas									Magallana gigas
Patella vulgata	13.4251	15.4719	12.3246	12.1343	12.3408	13.5077	13.8149	12.7708	Patella vulgata									Patella vulgata
Gibbula magus	12.1563	14.8176	10.8495	11.1623	11.8019	13.9566	13.0155	12.5121	Gibbula magus	10.2547								Gibbula magus
Chrysomallon squamiferum	10.6024	12.6704	9.24541	9.928	9.94327	10.7181	10.8847	10.7294	Chrysomallon squamiferum	9.50392	6.63315							Chrysomallon squamiferum
Gigantopelta aegis	11.7573	13.6319	9.87814	10.3265	10.5269	12.1512	11.6308	10.8468	Gigantopelta aegis	10.0782	7.56662	2.93268						Gigantopelta aegis
Aplysia californica	13.7062	15.4926	12.6584	12.9389	13.5201	14.4612	14.1511	13.5111	Aplysia californica	13.7513	11.2637	11.0837	11.2482					Aplysia californica
Biomphalaria straminea	14.2256	15.6826	11.9907	11.796	13.3807	14.5583	13.2098	12.8208	Biomphalaria straminea	12.2805	10.3991	10.0935	10.3979	7.27651				Biomphalaria straminea
Arion vulgaris	13.8057	14.8659	12.5457	12.6258	12.7249	14.3618	13.7177	12.8111	Arion vulgaris	13.1872	9.67297	10.763	11.832	5.75896	5.55021			Arion vulgaris
Acthatina fulica	14.3846	15.8979	12.9938	13.3032	15.6832	16.4725	14.3643	13.6603	Acthatina fulica	15.0035	11.4676	11.4801	12.3047	7.52092	7.42601	11.1353		Acthatina fulica
Pomacea canaliculata	12.2554	14.1007	10.6783	11.2699	11.2266	12.7831	12.9457	11.5488	Pomacea canaliculata	11.0163	8.56126	8.97946	9.25969	12.0692	11.0334	11.299	12.2272	Pomacea canaliculata
Monoplex corrugatus	13.1367	15.6725	11.6643	11.6446	12.2054	13.0873	12.8678	12.3737	Monoplex corrugatus	10.7098	8.71992	7.8395	9.6878	12.9596	13.8585	20.2071	23.2339	Monoplex corrugatus	6.75186
Deshayesiella sirenkoi	11.5889	13.5645	10.0359	9.9654	10.131	11.3468	11.1691	10.3753	Deshayesiella sirenkoi	9.65823	9.24166	8.31966	8.52279	11.0825	9.91014	10.9741	12.2657	Deshayesiella sirenkoi	9.02083	11.173
Callochiton septemvalvis	18.7004	20.2188	17.3552	16.9085	16.8399	17.885	18.0723	16.9274	Callochiton septemvalvis	17.3844	16.7579	15.2193	15.8057	17.8037	18.2245	18.4153	19.6201	Callochiton septemvalvis	16.568	20.224	12.3487
Acanthochitona discrepans	10.8768	12.9973	10.289	10.0062	10.2721	10.9916	11.0881	9.55806	Acanthochitona discrepans	9.33891	9.27687	8.0092	8.12729	11.1789	10.1105	10.549	11.4014	Acanthochitona discrepans	9.63533	10.991	4.65331	11.621
Acanthochitona rubrolineata	11.1442	12.9413	9.9047	9.51659	10.4169	10.9248	10.934	9.88276	Acanthochitona rubrolineata	9.73934	8.95924	8.32813	8.35976	11.3172	10.0322	10.908	12.5196	Acanthochitona rubrolineata	9.44663	11.1076	4.1319	11.6554	2.50873
Liolophura japonica	13.0693	15.0215	11.1296	11.2679	12.0359	13.2142	12.9519	11.1514	Liolophura japonica	11.6032	10.497	9.80608	9.89167	12.8283	11.3725	12.9648	13.6196	Liolophura japonica	10.9123	12.5805	4.6918	12.0899	3.84615	3.69212
Pictodentalium vernedei	14.1858	16.6447	12.7796	12.3655	13.3566	14.5226	13.2363	12.2179	Pictodentalium vernedei	13.5462	11.9302	10.7865	12.3973	14.9323	12.8238	15.9561	17.6094	Pictodentalium vernedei	11.728	14.222	10.5725	16.7137	8.60891	9.1067	10.7765
Siphonodentalium dalli	17.4146	19.2845	15.5837	15.3753	14.7417	17.167	15.5811	14.2941	Siphonodentalium dalli	15.3904	15.28	13.3467	14.4148	17.583	16.8448	19.6377	20.7592	Siphonodentalium dalli	13.5959	20.3204	12.3092	17.9818	11.4999	11.3552	12.9669	13.5572

## Sheet: Tabls S5
Table S5. Summary information for translocation rate of 25 species of molluscs, organised by taxonomic class.
Class	Species	Chromosomes	Nonsyntenic rate (%)	Translocation rate ( Mya per 1%)	Mean (Class)
Bivalvia	Conchocele bisecta	17	13.3197	39.7906	41.0987
	Mactra quadrangularis	19	15.2339	34.7908
	Mizuhopecten yessoensis	19	11.8769	44.6246
	Limnoperna fortunei	15	11.9138	44.4861
	Mytilisepta virgata	14	12.4205	42.6715
	Mytilus unguiculatus	14	13.6535	38.8179
	Pinctada fucata	14	13.155	40.2888
	Magallana gigas	14	12.2348	43.319
Gastropoda	Patella vulgata	9	12.8301	41.3093	41.8744
	Gibbula magus	18	12.1476	43.6299
	Chrysomallon squamiferum	15	10.5692	50.1459
	Gigantopelta aegis	14	11.2179	47.2458
	Aplysia californica	17	13.811	38.3751
	Biomphalaria straminea	18	13.1322	40.3588
	Arion vulgaris	26	13.7909	38.4311
	Acthatina fulica	31	14.9703	35.4034
	Pomacea canaliculata	14	11.8477	44.7344
	Monoplex corrugatus	35	13.5514	39.1104
Polyplacophora	Deshayesiella sirenkoi	11	10.5614	50.1829	45.4779
	Callochiton septemvalvis	13	17.6813	29.9752
	Acanthochitona discrepans	8	10.2403	51.7562
	Acanthochitona rubrolineata	8	10.3422	51.2461
	Liolophura japonica	13	11.9831	44.2291
Scaphopoda	Pictodentalium vernedei	10	13.0878	40.4958	37.0511
	Siphonodentalium dalli	9	15.7708	33.6065
